# Supplementary material for: Manipulating the Bacterial Cell Cycle and Cell Size by Titrating the Expression of Ribonucleotide Reductase
Source: PubMed Central journal article supplement (PMC5686538; doi:10.1128/mbio.01741-17), 2017-11-14

**A**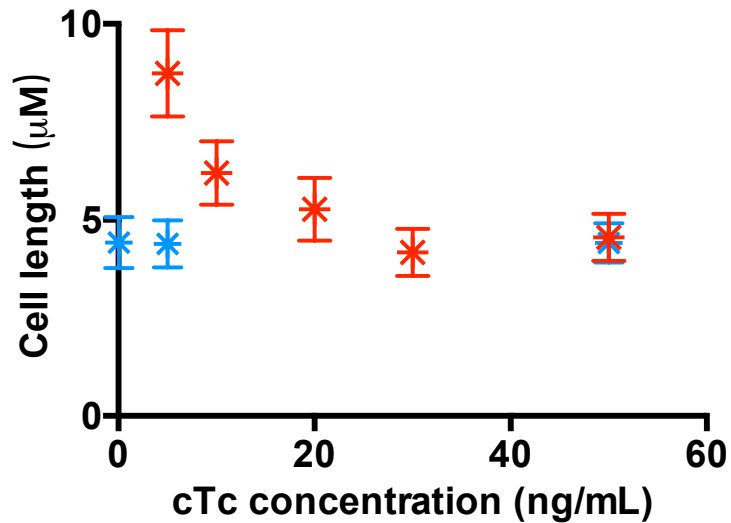**B**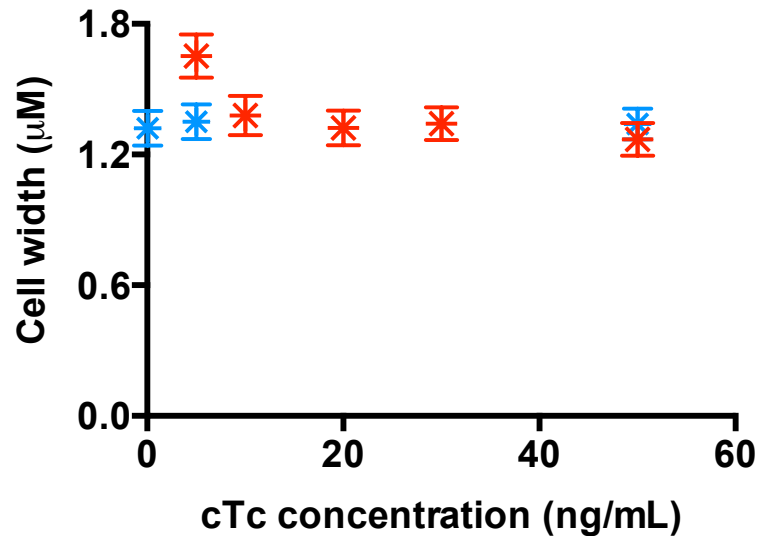

Supplement: mbo006173599sf5.pdf [file mbo006173599sf5.pdf]
